# Supplementary material
Source: publisher figshare collection journal article supplement (https://acs.figshare.com/ndownloader/files/26564640)
Supplement: Supplementary file 1 [file 26564640]

## SUPPORTING INFORMATION

### **Design of Dissolvable Microneedles for Delivery of a Pfs47-based Malaria Transmission-blocking Vaccine**

*Lampouguin Yenkoidiok-Douti<sup>1,2</sup>, Carolina Barillas-Mury<sup>2</sup>, and Christopher M. Jewell<sup>\*1,3,4,5,6</sup>*

<sup>1</sup> Fischell Department of Bioengineering, University of Maryland, College Park, 8278 Paint Branch Drive, College Park, MD, 20742, United States

<sup>2</sup> Laboratory of Malaria and Vector Research, National Institute of Allergy and Infectious Diseases, National Institute of Health, Rockville, MD, 20852, United States

<sup>3</sup> Department of Veterans Affairs, VA Maryland Health Care System 10. N Green Street, Baltimore, MD 21201, USA

<sup>4</sup> Robert E. Fischell Institute for Biomedical Devices, 8278 Paint Branch Drive, College Park, MD 20742, United States

<sup>5</sup> Department of Microbiology and Immunology, University of Maryland Medical School, 685 West Baltimore Street, HSF-I Suite 380, Baltimore, MD, 21201, United States

<sup>6</sup> Marlene and Stewart Greenebaum Cancer Center, 22 S. Greene Street, Suite N9E17, Baltimore, MD 21201, United States

\* To whom correspondence should be addressed: Prof. Christopher M. Jewell, Fischell Department of Bioengineering, University of Maryland, Room 5110, 8278 Paint Branch Drive, College Park, MD 20742. Office: 301-405-9628, Fax: 301-405-9953 E-mail: [cmjewell@umd.edu](mailto:cmjewell@umd.edu); Web: [jewell.umd.edu](http://jewell.umd.edu)

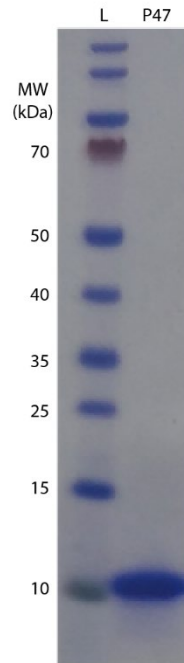

**Figure S1.** Coomassie blue stained SDS Page of purified soluble P47 antigen expressed in *E. coli*.

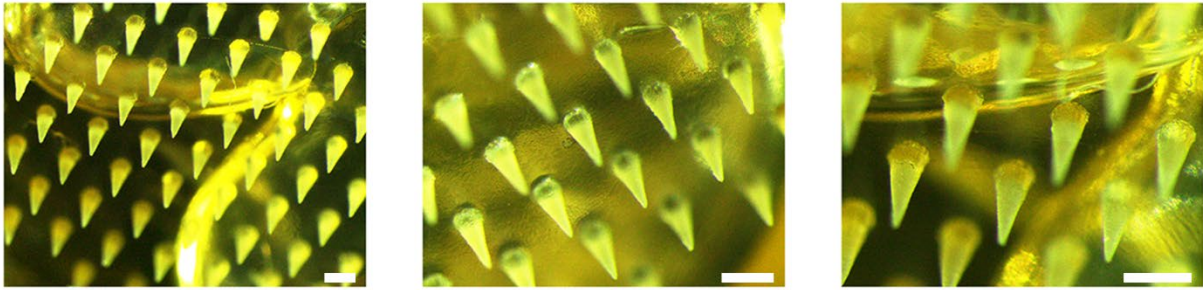

**Figure S2.** Image of gelatin DMN patch containing P47 vaccine using a stereomicroscope. Scale bars 500  $\mu\text{m}$ . The yellow appearance of the microneedle is due to the gelatin.

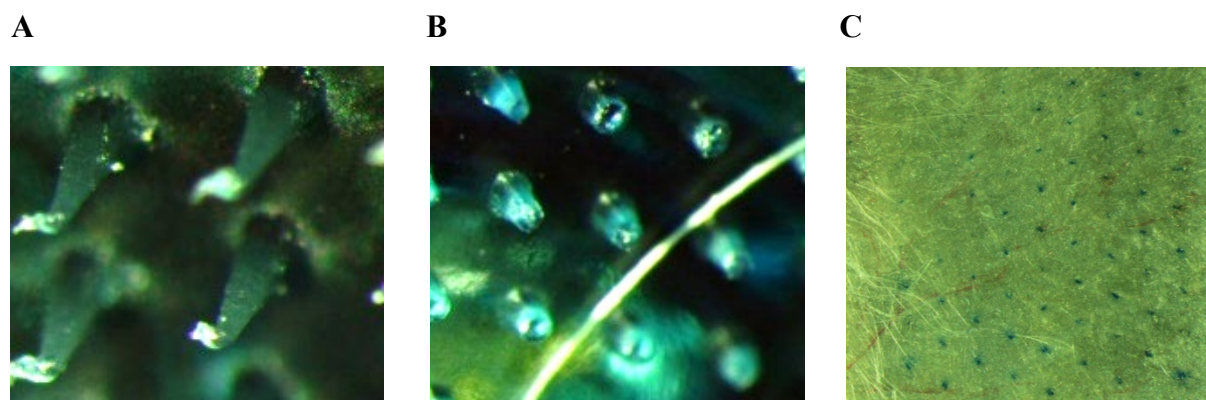

**Figure S3.** Dissolution of microneedles after insertion into mouse ear skin. A microneedle patch loaded with Trypan blue, to facilitate imaging, was inserted into mouse ear and imaged by bright-field microscopy. A close-up of the microneedle patch is shown (A) 1 min and (B) 30 min after insertion. (C) The penetration pattern in the skin demonstrating the characteristic array pattern following removal of the microneedle array.

|                    | <i>CpG concentration (ng/<math>\mu</math>L)</i> |    |        |     |        |     |
|--------------------|-------------------------------------------------|----|--------|-----|--------|-----|
|                    | 5 min                                           |    | 15 min |     | 30 min |     |
| <b>DMN-CpG</b>     | 72                                              | 76 | 139    | 155 | 216    | 208 |
| <b>DMN-CpG/P47</b> | 30                                              | 34 | 93     | 97  | 187    | 185 |

**Figure S4.** Quantification of CpG concentration in dissolved microneedles by Nanodrop A260 nm absorbance. The arrays were dissolved for 5, 15, 30 min and were quantified in duplicate.
